# Supplementary material for: ZIP10 drives osteosarcoma proliferation and chemoresistance through ITGA10-mediated activation of the PI3K/AKT pathway
Source: J Exp Clin Cancer Res. 2021 Oct 27;40:340. doi: 10.1186/s13046-021-02146-8 (PMC8549349; doi:10.1186/s13046-021-02146-8)
Supplement: Supplementary file 2 — Additional file 2: Table S1. Primer sequences for qRT-PCR. [file 13046_2021_2146_MOESM2_ESM.xlsx]

## Sheet: TABLE 1
	TABLE S1 Primer sequences for qRT-PCR
	Genes	Forward primers (5'→ 3')	Reverse primers (5'→ 3')
	ZIP1	TGAGCCTAGTAAGCTGTTTCGC	CAGGGCCTCATCTATGGCA
	ZIP2	TGGGCAGTGTTCTCCATACTA	AATAAAGGCCATGAAGGCAAAAC
	ZIP3	ATGGTGGGCGTGTTCTTCTTC	TCAGGACCTTCTGGAGCTTT
	ZIP4	TGGTCTCTACGTGGCACTC	GGGTCCCGTACTTTCAACATC
	ZIP5	CTGGACCACTCATTGGCTGAC	GCGGCTGTCGATCTGATAAAG
	ZIP6	ATGCAAGTCACCACCATAGTCA	ACGTGGAATCAAAATAGGCACT
	ZIP7	TGAGACCTCAGAACGCTGAAG	CTCGAAAGGAAGCCCCAATGG
	ZIP8	ATGCTACCCAAATAACCAGCTC	ACAGGAATCCATATCCCCAAACT
	ZIP9	CATGCTGGCTTAGAGCGGAAT	TGGTGCTGCCAATGCAAAGA
	ZIP10	TTTCACTCACATAACCACCAGC	GTGATGACGTAGGCGGTGATT
	ZIP11	CAGCTCTCGTGTTCGTATTCTC	TCAGCCAAGTAGACAAAAGCC
	ZIP12	TTCTTCTACTCAGCCGTGTTTTT	GTCACCAGCAGAGAGAACCT
	ZIP13	TCCCCCAAGGGAGTAGTTGG	AGGCGATGTAGAGAAAGCCG
	ZIP14	GAGGCTCACGCTTCATCCC	CCCTCGCCATACCGATGTATTA
	ACTB	CATGTACGTTGCTATCCAGGC	CTCCTTAATGTCACGCACGAT
	ITGA2	CCTACAATGTTGGTCTCCCAGA	AGTAACCAGTTGCCTTTTGGATT
	ITGA3	TCAACCTGGATACCCGATTCC	GCTCTGTCTGCCGATGGAG
	ITGA6	ATGCACGCGGATCGAGTTT	TTCCTGCTTCGTATTAACATGCT
	ITGA9	GACGCTGATCCCTTGCTATGA	CGGTGAAGAAGCCCGCTATC
	ITGA10	ACTTAGGTGACTACCAACTGGG	CCACAAGCACGAGACCAGA
	ITGB3	GTGACCTGAAGGAGAATCTGC	CCGGAGTGCAATCCTCTGG
	ITGB8	CGTGACTTTCGTCTTGGATTTGG	TCCTTTCGGGGTGGATGCTAA
