# Supplementary material for: ZIP10 drives osteosarcoma proliferation and chemoresistance through ITGA10-mediated activation of the PI3K/AKT pathway
Source: J Exp Clin Cancer Res. 2021 Oct 27;40:340. doi: 10.1186/s13046-021-02146-8 (PMC8549349; doi:10.1186/s13046-021-02146-8)
Supplement: Supplementary file 3 — Additional file 3: Table S2. Primer sequences for ChIP assay. [file 13046_2021_2146_MOESM3_ESM.xlsx]

## Sheet: TABLE 2
	TABLE S2 Primer sequences for ChIP assay
	Sites	Forward primers (5'→ 3')	Reverse primers (5'→ 3')
	CREB1	TTG AGG CCC CTA TTC CTG TC	TTG GGA GTG TGG AGC TTC TTA
	CREB2	TGG CAG AGG AGT GGT CTA AT	ACT CCA CTT GGT TCT GTC CT
	Ctrl region	CAG CAC CAA GGC AGA GAA AT	CCC TCC CAA TGG CAG CTA AAA
	β-actin	TCC TCA ATC TCG CTC TCG CT	CCG CTG GGT TTT ATA GGG CG
