# Supplementary material for: ZIP10 drives osteosarcoma proliferation and chemoresistance through ITGA10-mediated activation of the PI3K/AKT pathway
Source: J Exp Clin Cancer Res. 2021 Oct 27;40:340. doi: 10.1186/s13046-021-02146-8 (PMC8549349; doi:10.1186/s13046-021-02146-8)
Supplement: Supplementary file 4 — Additional file 4: Table S3. Relationships between ZIP10 expression and clinical pathological characteristics of 52 patients (without chemotherapy) of osteosarcoma. [file 13046_2021_2146_MOESM4_ESM.xlsx]

## Sheet: TABLE 3
		TABLE S3 Relationships between ZIP10 expression and clinical pathological characteristics of 52 patients（without chemotherapy) of osteosarcoma
		Characteristics	All case	Expression of ZIP10		p-value
				Low(n=22)	High(n=30)
		Gender
		Male	29	12	17	>0.9999
		Female	23	10	13
		Age(years)
		＜14	18	7	11	0.7749
		≥14	34	15	19
		Anatomical site
		Femur	29(55.8%)	11	18	0.6211
		Tibia	12 (23.1%)	6	6
		Humer	9 (17.3%)	5	4
		Pelvis	1 (1.9%)	0	1
		Other	1 (1.9%)	0	1
		Enneking's stage
		≤ⅡA	25	15	10	0.0238
		＞ⅡB	27	7	20
		AJCC stage
		≤ⅡA	22	14	8	0.0111
		＞ⅡB	30	8	22
